# Supplementary material for: New Biomarkers and Their Potential Role in Heart Failure Treatment Optimisation—An African Perspective
Source: MDPI journal article supplement (doi:10.3390/jcdd9100335), 2022-10-02
Supplement: s1 [file s1]

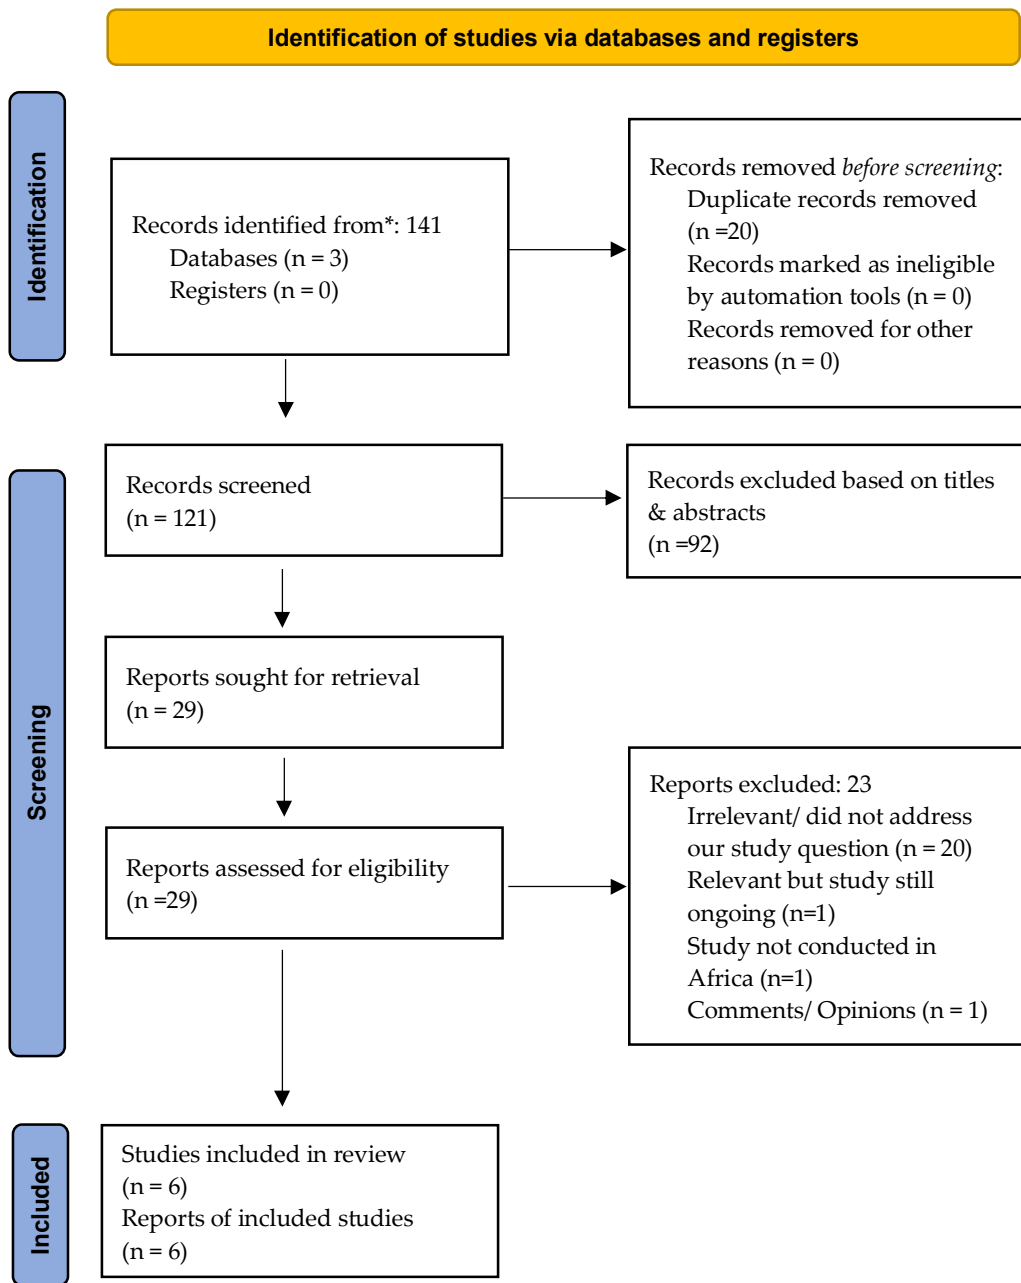

Figure S1: Preferred Reporting Items for Systematic Reviews and Meta-Analyses (PRISMA) 2020 flow diagram.
